# Supplementary material for: Prenatal HIV Test Uptake and Its Associated Factors for Prevention of Mother to Child Transmission of HIV in East Africa
Source: MDPI journal article supplement (doi:10.3390/ijerph18105289), 2021-05-16
Supplement: s1 [file s1]

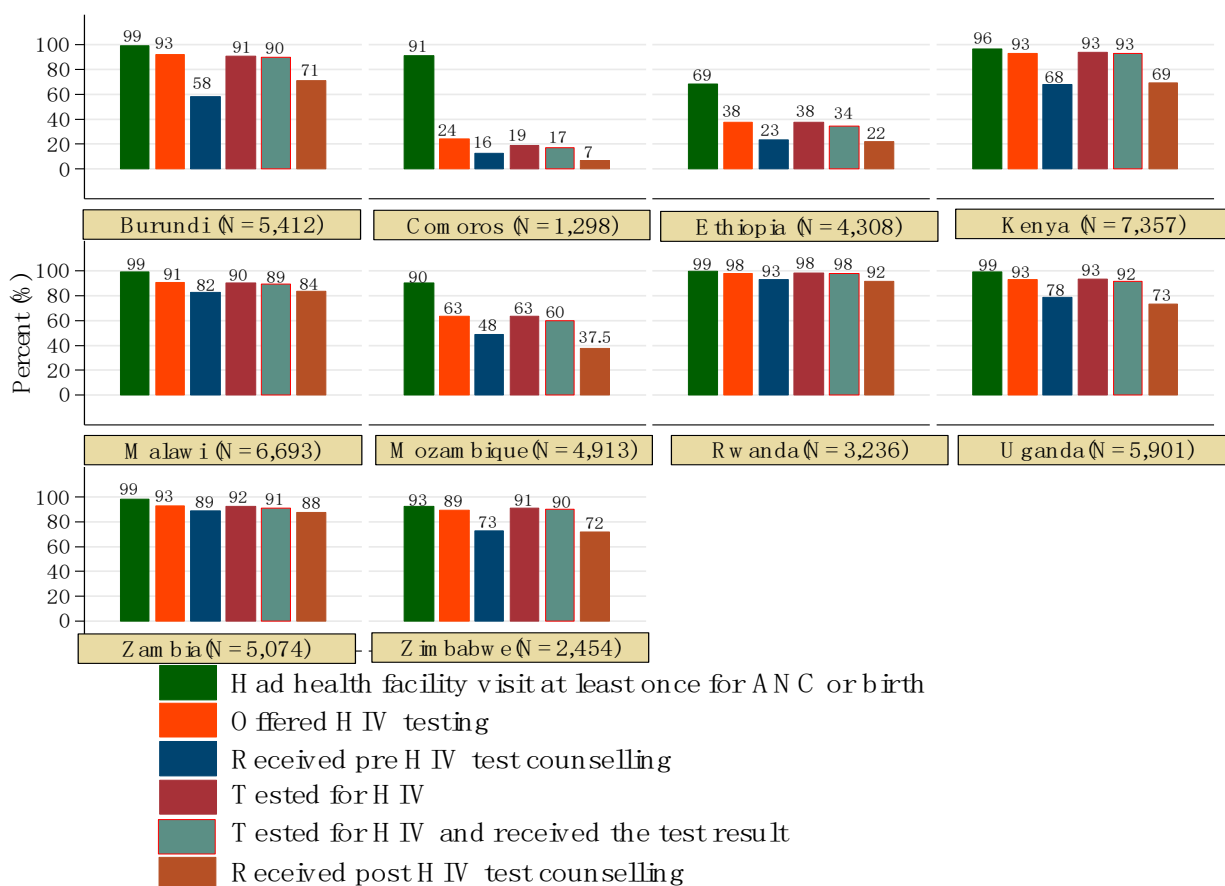

Percentage are calculated from the total number of women (N) in the study for each country

Figure 1: Health facility visit during pregnancy and HIV test services uptake in East Africa countries.
