# Supplementary material for: Prenatal HIV Test Uptake and Its Associated Factors for Prevention of Mother to Child Transmission of HIV in East Africa
Source: MDPI journal article supplement (doi:10.3390/ijerph18105289), 2021-05-16
Supplement: s1 [file s1]

Supplementary table 1a: Adjusted OR (95% CI) of factors associated with prenatal HIV test uptake for PMTCT among mother aged 15-49 years in Burundi, Comoros, Ethiopia, Kenya, and Malawi

|                                   | Burundi          |         | Comoros          |         | Ethiopia         |         | Kenya            |         | Malawi           |         |
|-----------------------------------|------------------|---------|------------------|---------|------------------|---------|------------------|---------|------------------|---------|
| Characteristics                   | aOR (95% CI)     | P-Value |
| <b>Community Level Factors</b>    |                  |         |                  |         |                  |         |                  |         |                  |         |
| Residence                         |                  |         |                  |         |                  |         |                  |         |                  |         |
| Urban                             | 1.00             |         | 1.00             |         | 1.00             |         | 1.00             |         | 1.00             |         |
| Rural                             | 0.61(0.29, 1.28) | 0.194   | 0.83(0.42, 1.66) | 0.615   | 0.38(0.20, 0.73) | 0.004   | 1.05(0.55, 2.01) | 0.878   | 1.12(0.50, 2.51) | 0.768   |
| <b>Predisposing factors</b>       |                  |         |                  |         |                  |         |                  |         |                  |         |
| <b>Socio-demographics factors</b> |                  |         |                  |         |                  |         |                  |         |                  |         |
| Maternal age                      |                  |         |                  |         |                  |         |                  |         |                  |         |
| 15-19 years                       | 1.00             |         | 1.00             |         | 1.00             |         | 1.00             |         | 1.00             |         |
| 20-34 years                       | 0.85(0.56, 1.27) | 0.435   | 1.17(0.67, 2.04) | 0.567   | 0.91(0.63, 1.32) | 0.642   | 0.83(0.48, 1.45) | 0.528   | 0.94(0.60, 1.49) | 0.812   |
| 35-49 years                       | 0.66(0.40, 1.09) | 0.112   | 1.21(0.52, 2.82) | 0.653   | 1.08(0.66, 1.76) | 0.741   | 0.76(0.39, 1.47) | 0.425   | 0.80(0.39, 1.63) | 0.539   |
| Maternal education                |                  |         |                  |         |                  |         |                  |         |                  |         |
| No education                      | 1.00             |         | 1.00             |         | 1.00             |         | 1.00             |         | 1.00             |         |
| Primary                           | 1.17(0.85, 1.62) | 0.310   | 0.72(0.36, 1.46) | 0.373   | 1.89(1.27, 2.81) | 0.002   | 2.06(1.01, 4.21) | 0.046   | 1.08(0.58, 2.02) | 0.795   |
| Secondary and higher              | 1.24(0.67, 2.30) | 0.481   | 1.32(0.69, 2.55) | 0.390   | 2.41(1.18, 4.94) | 0.016   | 7.81(1.86, 32.8) | 0.005   | 0.98(0.42, 2.28) | 0.972   |
| Maternal occupation               |                  |         |                  |         |                  |         |                  |         |                  |         |
| Not working                       | 1.00             |         | 1.00             |         | 1.00             |         | 1.00             |         | 1.00             |         |
| Professional work                 | 0.66(0.29, 1.53) | 0.341   | 0.60(0.32, 1.12) | 0.112   | 1.13(0.67, 1.91) | 0.638   | 0.71(0.29, 1.77) | 0.474   | 1.35(0.54, 3.35) | 0.510   |
| Nonprofessional work              | 0.81(0.40, 1.62) | 0.557   | 0.73(0.38, 1.42) | 0.363   | 1.27(0.87, 1.85) | 0.213   | 1.36(0.78, 2.35) | 0.271   | 0.94(0.61, 1.47) | 0.817   |
| Partner education                 |                  |         |                  |         |                  |         |                  |         |                  |         |
| No education                      | 1.00             |         | 1.00             |         | 1.00             |         | 1.00             |         | 1.00             |         |
| Primary                           | 0.86(0.63, 1.19) | 0.382   | 2.19(1.20, 3.98) | 0.010   | 1.13(0.78, 1.63) | 0.499   | 2.46(1.17, 5.17) | 0.017   | 1.21(0.63, 2.31) | 0.550   |
| Secondary and Higher              | 0.86(0.44, 1.69) | 0.677   | 2.72(1.37, 5.37) | 0.004   | 1.33(0.74, 2.37) | 0.330   | 1.78(0.75, 4.20) | 0.184   | 1.17(0.54, 2.52) | 0.672   |
| History of Sexual violence        |                  |         |                  |         |                  |         |                  |         |                  |         |
| No                                | 1.00             |         | 1.00             |         | 1.00             |         | 1.00             |         | 1.00             |         |
| Yes                               | 0.65(0.48, 0.89) | 0.007   | 0.39(0.03, 4.74) | 0.464   | 1.31(0.71, 2.41) | 0.373   | 1.03(0.43, 2.48) | 0.930   | 0.79(0.48, 1.29) | 0.348   |
| Media exposure                    |                  |         |                  |         |                  |         |                  |         |                  |         |
| Read newspapers or magazines      |                  |         |                  |         |                  |         |                  |         |                  |         |
| No                                | 1.00             |         | 1.00             |         | 1.00             |         | 1.00             |         | 1.00             |         |
| Yes                               | 0.99(0.42, 2.30) | 0.987   | 1.78(0.94, 3.37) | 0.075   | 1.34(0.60, 2.98) | 0.462   | 1.73(0.70, 4.26) | 0.229   | 1.02(0.57, 1.82) | 0.923   |
| Listened to the radio             |                  |         |                  |         |                  |         |                  |         |                  |         |
| No                                | 1.00             |         | 1.00             |         | 1.00             |         | 1.00             |         | 1.00             |         |
| Yes                               | 1.31(0.94, 1.83) | 0.110   | 0.83(0.48, 1.41) | 0.493   | 1.08(0.74, 1.58) | 0.656   | 1.34(0.79, 2.27) | 0.272   | 1.43(0.95, 2.17) | 0.082   |

|                                     |                  |       |                  |       |                  |        |                  |        |                  |       |
|-------------------------------------|------------------|-------|------------------|-------|------------------|--------|------------------|--------|------------------|-------|
| Watched television                  |                  |       |                  |       |                  |        |                  |        |                  |       |
| No                                  | 1.00             |       | 1.00             |       | 1.00             |        | 1.00             |        | 1.00             |       |
| Yes                                 | 0.83(0.40, 1.73) | 0.627 | 1.10(0.59, 2.04) | 0.751 | 1.83(1.14, 2.92) | 0.011  | 2.32(0.88, 6.10) | 0.088  | 0.87(0.47, 1.63) | 0.676 |
| <b>Enabling factors</b>             |                  |       |                  |       |                  |        |                  |        |                  |       |
| Household wealth index              |                  |       |                  |       |                  |        |                  |        |                  |       |
| Poor                                | 1.00             |       | 1.00             |       | 1.00             |        | 1.00             |        | 1.00             |       |
| Middle                              | 1.05(0.76, 1.45) | 0.773 | 1.25(0.68, 2.30) | 0.452 | 2.36(1.48, 3.75) | <0.001 | 1.22(0.59, 2.53) | 0.579  | 0.86(0.56, 1.31) | 0.486 |
| Rich                                | 1.57(0.81, 3.04) | 0.180 | 0.77(0.33, 1.81) | 0.563 | 2.03(1.87, 3.74) | <0.001 | 1.85(0.34, 9.81) | 0.469  | 1.26(0.52, 3.02) | 0.595 |
| Household Decision making           |                  |       |                  |       |                  |        |                  |        |                  |       |
| Not Involved                        | 1.00             |       | 1.00             |       | 1.00             |        | 1.00             |        | 1.00             |       |
| Involved                            | 0.95(0.71, 1.28) | 0.776 | 1.28(0.74, 2.20) | 0.365 | 0.76(0.54, 1.07) | 0.121  | 2.03(1.22, 3.38) | 0.006  | 0.72(0.47, 1.09) | 0.128 |
| Health facility distance            |                  |       |                  |       |                  |        |                  |        |                  |       |
| A big problem                       | 0.84(0.60, 1.16) | 0.283 | 0.77(0.46, 1.31) | 0.330 | 0.87(0.61, 1.23) | 0.425  | 0.72(0.42, 1.25) | 0.235  | 1.17(0.74, 1.85) | 0.511 |
| Not a big problem                   | 1.00             |       | 1.00             |       | 1.00             |        | 1.00             |        | 1.00             |       |
| Perinatal awareness of PMTCT of HIV |                  |       |                  |       |                  |        |                  |        |                  |       |
| Aware of MTCT during pregnancy      |                  |       |                  |       |                  |        |                  |        |                  |       |
| No                                  | 1.00             |       | 1.00             |       | 1.00             |        | 1.00             |        | 1.00             |       |
| Yes                                 | 1.07(0.72, 1.59) | 0.725 | 1.21(0.63, 2.31) | 0.558 | 1.22(0.78, 1.90) | 0.364  | 0.46(0.26, 0.81) | 0.007  | 1.27(0.67, 2.39) | 0.459 |
| Aware of MTCT during birth          |                  |       |                  |       |                  |        |                  |        |                  |       |
| No                                  | 1.00             |       | 1.00             |       | 1.00             |        | 1.00             |        | 1.00             |       |
| Yes                                 | 1.10(0.60, 2.00) | 0.744 | 1.11(0.58, 2.15) | 0.733 | 1.34(0.81, 2.24) | 0.249  | 2.86(1.60, 5.11) | <0.001 | 1.56(0.73, 3.35) | 0.246 |
| Aware of MTCT during breastfeeding  |                  |       |                  |       |                  |        |                  |        |                  |       |
| No                                  | 1.00             |       | 1.00             |       | 1.00             |        | 1.00             |        | 1.00             |       |
| Yes                                 | 1.33(0.81, 2.17) | 0.249 | 0.74(0.35, 1.55) | 0.425 | 1.47(0.89, 2.43) | 0.131  | 2.29(1.24, 4.20) | 0.007  | 0.92(0.40, 2.10) | 0.845 |
| <b>Need factors</b>                 |                  |       |                  |       |                  |        |                  |        |                  |       |
| Desire for pregnancy                |                  |       |                  |       |                  |        |                  |        |                  |       |
| Desired pregnancy                   | 1.00             |       | 1.00             |       | 1.00             |        | 1.00             |        | 1.00             |       |
| Not desired pregnancy               | 0.97(0.57, 1.62) | 0.912 | 1.17(0.59, 2.34) | 0.636 | 0.67(0.33, 1.36) | 0.274  | 0.54(0.25, 1.17) | 0.120  | 0.51(0.29, 0.87) | 0.014 |

Supplementary table 1b: Adjusted OR (95% CI) of factors associated with prenatal HIV test uptake for PMTCT among mothers aged 15-49 years in Mozambique, Rwanda, Uganda, Zambia, and Zimbabwe.

[illegible]

|                                     |                  |        |                   |       |                  |       |                  |        |                    |        |
|-------------------------------------|------------------|--------|-------------------|-------|------------------|-------|------------------|--------|--------------------|--------|
| Household wealth index              |                  |        |                   |       |                  |       |                  |        |                    |        |
| Poor                                | 1.00             |        | 1.00              |       | 1.00             |       | 1.00             |        | 1.00               |        |
| Middle                              | 1.63(1.03, 2.58) | 0.036  | 1.71(0.31, 9.27)  | 0.527 | 1.55(1.03, 2.35) | 0.034 | 1.05(0.72, 1.53) | 0.768  | 1.47(0.80, 2.68)   | 0.204  |
| Rich                                | 3.15(1.39, 7.10) | 0.006  | 3.71(0.33, 41.8)  | 0.287 | 0.96(0.41, 2.25) | 0.938 | 0.95(0.37, 2.44) | 0.923  | 2.48(0.73, 8.38)   | 0.140  |
| Household Decision making           |                  |        |                   |       |                  |       |                  |        |                    |        |
| Not Involved                        | 1.00             |        | 1.00              |       | 1.00             |       | 1.00             |        | 1.00               |        |
| Involved                            | 1.16(0.82, 1.63) | 0.388  | 0.78(0.19, 3.18)  | 0.732 | 0.96(0.69, 1.34) | 0.838 | 0.82(0.60, 1.12) | 0.220  | 0.56(0.31, 1.01)   | 0.057  |
| Health facility distance            |                  |        |                   |       |                  |       |                  |        |                    |        |
| Challenging                         | 1.26(0.79, 2.00) | 0.331  | 0.19(0.04, 0.96)  | 0.044 | 1.15(0.82, 1.61) | 0.421 | 0.90(0.63, 1.26) | 0.531  | 1.08(0.56, 2.08)   | 0.811  |
| Not challenging                     | 1.00             |        | 1.00              |       | 1.00             |       | 1.00             |        | 1.00               |        |
| Perinatal awareness of PMTCT of HIV |                  |        |                   |       |                  |       |                  |        |                    |        |
| Aware of MTCT during pregnancy      |                  |        |                   |       |                  |       |                  |        |                    |        |
| No                                  | 1.00             |        | 1.00              |       | 1.00             |       | 1.00             |        | 1.00               |        |
| Yes                                 | 0.76(0.48, 1.20) | 0.253  | 8.33(2.39, 29.01) | 0.001 | 0.56(0.37, 0.83) | 0.004 | 0.90(0.65, 1.22) | 0.508  | 0.57(0.25, 1.31)   | 0.191  |
| Aware of MTCT during birth          |                  |        |                   |       |                  |       |                  |        |                    |        |
| No                                  | 1.00             |        | 1.00              |       | 1.00             |       | 1.00             |        | 1.00               |        |
| Yes                                 | 1.45(0.93, 2.26) | 0.092  | 2.58(0.15, 42.8)  | 0.506 | 1.50(0.83, 2.71) | 0.174 | 2.43(1.64, 3.60) | <0.001 | 5.89(2.72, 12.74)  | <0.001 |
| Aware of MTCT during breastfeeding  |                  |        |                   |       |                  |       |                  |        |                    |        |
| No                                  | 1.00             |        | 1.00              |       | 1.00             |       | 1.00             |        | 1.00               |        |
| Yes                                 | 3.13(1.89, 5.20) | <0.001 | 0.47(0.006, 33.3) | 0.732 | 1.19(0.69, 2.06) | 0.515 | 1.71(1.09, 2.67) | 0.018  | 1.13(0.59, 2.16)   | 0.691  |
| <b>Need factors</b>                 |                  |        |                   |       |                  |       |                  |        |                    |        |
| A desire for the pregnancy          |                  |        |                   |       |                  |       |                  |        |                    |        |
| Wanted pregnancy                    | 1.00             |        | 1.00              |       | 1.00             |       | 1.00             |        | 1.00               |        |
| Unwanted pregnancy                  | 0.58(0.25, 1.33) | 0.202  | 0.07(0.01, 0.45)  | 0.005 | 0.94(0.53, 1.67) | 0.859 | 0.76(0.41, 1.42) | 0.405  | 0.069(0.008, 0.46) | 0.006  |

\*\*\*\*\* no estimate due to small sample size or empty cell
