# Supplementary material for: Prenatal HIV Test Uptake and Its Associated Factors for Prevention of Mother to Child Transmission of HIV in East Africa
Source: MDPI journal article supplement (doi:10.3390/ijerph18105289), 2021-05-16
Supplement: s1 [file s1]

**Table 1A: Characteristics of the study participants in each and all East African countries (DHS, 2011–2017)**

|                                | Burundi     | Comoros    | Ethiopia   | Kenya      | Malawi     | Mozambique | Rwanda     | Uganda     | Zambia     | Zimbabwe   | Total participants |
|--------------------------------|-------------|------------|------------|------------|------------|------------|------------|------------|------------|------------|--------------------|
|                                | n (%)       | n (%)      | n (%)      | n (%)      | n (%)      | n (%)      | n (%)      | n (%)      | n (%)      | n (%)      | n (%)              |
| <b>Community-level factors</b> |             |            |            |            |            |            |            |            |            |            |                    |
| Residence                      |             |            |            |            |            |            |            |            |            |            |                    |
| Urban                          | 489 (9)     | 368(28.4)  | 520(12.1)  | 2618(35.6) | 911(13.6)  | 1356(27.6) | 561(17.3)  | 1258(21.3) | 1711(33.7) | 689(28.1)  | 10481 (22.5)       |
| Rural                          | 4923(91)    | 929(71.6)  | 3788(87.9) | 4739(64.4) | 5781(86.4) | 3557(72.4) | 2675(82.7) | 4643(78.7) | 3363(66.3) | 1765(71.9) | 36164 (77.5)       |
| Predisposing factors           |             |            |            |            |            |            |            |            |            |            |                    |
| Demographic Factors            |             |            |            |            |            |            |            |            |            |            |                    |
| Maternal age                   |             |            |            |            |            |            |            |            |            |            |                    |
| 15-24                          | 1407(26)    | 404(31.2)  | 1260(29.3) | 2864(38.9) | 3083(46.1) | 2015(41.2) | 871(26.9)  | 2511(42.6) | 1981(39.1) | 966(39.4)  | 17364 (37.3)       |
| 25-34                          | 2742(50.7)  | 622(47.9)  | 2189(50.9) | 3432(46.7) | 2584(38.7) | 2000(40.8) | 1666(51.5) | 2473(41.9) | 2194(43.2) | 1144(46.6) | 21045 (45.1)       |
| 35-49                          | 1259(23.3)  | 271(20.9)  | 854(19.9)  | 1061(14.4) | 1018(15.2) | 882(18)    | 699(21.6)  | 912(15.5)  | 899(17.3)  | 343(14)    | 8198 (17.6)        |
| Maternal education             |             |            |            |            |            |            |            |            |            |            |                    |
| No education                   | 2365 (43.7) | 562(43.3)  | 2606(60.5) | 834(11.3)  | 794(11.9)  | 1747(35.6) | 439(13.6)  | 566(9.6)   | 533(10.5)  | 32(1.3)    | 10478 (22.5)       |
| Primary                        | 2398 (45.3) | 323(24.9)  | 1319(30.6) | 4023(54.7) | 4480(66.9) | 2546(51.8) | 2316(71.6) | 3577(60.6) | 2740(54.1) | 787(32.1)  | 24509 (52.6)       |
| Secondary and higher           | 650 (12)    | 413(31.8)  | 383(8.9)   | 2499(34)   | 1419(21.2) | 620(12.6)  | 481(14.8)  | 1757(29.8) | 1795(35.4) | 1635(66.6) | 11652 (24.9)       |
| Maternal occupation            |             |            |            |            |            |            |            |            |            |            |                    |
| Not working                    | 412(7.6)    | 741(59.2)  | 2510(58.3) | 1278(36.2) | 2138(32)   | 2656(81.4) | 256(7.9)   | 1106(18.8) | 2251(44.9) | 1329(54.3) | 14678 (35.7)       |
| Professional work              | 494(9.1)    | 193(15.4)  | 694(16.1)  | 565(16)    | 552(8.2)   | 516(15.8)  | 426(13.2)  | 1209(20.5) | 1024(20.4) | 757(31)    | 6429 (15.7)        |
| Non-professional work          | 4506(83.3)  | 318(25.4)  | 1104(25.6) | 1687(47.8) | 4002(59.8) | 89(2.8)    | 2553(78.9) | 3583(60.8) | 1738(34.7) | 360(14.7)  | 19940 (48.6)       |
| Partner education              |             |            |            |            |            |            |            |            |            |            |                    |
| No education                   | 1775(36.2)  | 459(36.9)  | 1838(45.1) | 304(9.5)   | 637(11.4)  | 1376(29.6) | 462(16)    | 458(9.2)   | 418(9.2)   | 27(1.3)    | 7755 (20.4)        |
| Primary                        | 2532(51.5)  | 322(25.9)  | 1651(40.5) | 1609(50.6) | 3018(54)   | 2412(51.9) | 2051(71)   | 2618(52.7) | 1837(40.6) | 483(23.1)  | 18533 (48.6)       |
| Secondary and Higher           | 605(12.3)   | 462(37.1)  | 588(14.4)  | 1270(39.9) | 1935(34.6) | 856(18.5)  | 374(13)    | 1896(38.1) | 2268(50.2) | 1582(75.6) | 11837 (31.0)       |
| History of sexual violence     |             |            |            |            |            |            |            |            |            |            |                    |
| No                             | 2788(75.5)  | 1012(98.1) | 1661(89)   | 1250(90.3) | 1526(81.8) | 2519(93.3) | 669(92)    | 2462(78.2) | 3225(84.2) | 1682(89)   | 18794 (85.0)       |
| Yes                            | 906(24.5)   | 20(1.9)    | 206(11)    | 134(9.7)   | 340(18.2)  | 180(6.7)   | 59(8)      | 687(21.8)  | 604(15.8)  | 207(11)    | 3342 (15.0)        |
| Media exposure                 |             |            |            |            |            |            |            |            |            |            |                    |
| Read newspapers or magazines   |             |            |            |            |            |            |            |            |            |            |                    |
| No                             | 5181(95.7)  | 1105(85.1) | 4004(93)   | 5214(70.9) | 5601(83.7) | 4412(89.8) | 2543(78.7) | 4778(81)   | 3737(73.6) | 1606(65.5) | 38180 (81.9)       |
| Yes                            | 231(4.3)    | 193(14.9)  | 304(7)     | 2141(29.1) | 1091(16.3) | 501(10.2)  | 689(21.3)  | 1123(19)   | 1338(26.4) | 848(34.5)  | 8458 (18.1)        |
| Listened to the radio          |             |            |            |            |            |            |            |            |            |            |                    |
| No                             | 3045(56.3)  | 649(50)    | 3115(72)   | 1564(21.3) | 3569(53.3) | 1705(34.7) | 600(18.5)  | 1623(27.5) | 2169(42.8) | 1094(44.6) | 19134 (41.0)       |
| Yes                            | 2367(43.7)  | 649(50)    | 1193(28)   | 5790(78.7) | 3124(46.7) | 3208(65.3) | 2636(81.5) | 4278(72.5) | 2905(57.2) | 1359(55.4) | 27508 (59.0)       |
| Watched television             |             |            |            |            |            |            |            |            |            |            |                    |
| No                             | 5022(92.8)  | 444(34.2)  | 3494(81.1) | 4243(57.7) | 5656(84.5) | 3590(73.1) | 2023(62.6) | 4288(72.7) | 3365(66.3) | 1549(63.1) | 33673 (72.2)       |
| Yes                            | 390(7.2)    | 854(65.8)  | 814(18.9)  | 3108(43.3) | 1037(15.5) | 1323(26.9) | 1207(37.4) | 1614(27.3) | 1709(33.7) | 905(36.9)  | 12961 (27.8)       |
| <b>Enabling factors</b>        |             |            |            |            |            |            |            |            |            |            |                    |
| Household wealth index         |             |            |            |            |            |            |            |            |            |            |                    |
| Poor                           | 2387(44.1)  | 569(43.8)  | 1011(23.5) | 1823(24.8) | 3210(48)   | 2211(45)   | 1464(45.3) | 2578(43.7) | 2417(47.6) | 1114(45.4) | 21187 (45.4)       |

|                                 |            |             |            |            |            |            |            |            |            |            |              |
|---------------------------------|------------|-------------|------------|------------|------------|------------|------------|------------|------------|------------|--------------|
| Middle                          | 2141(39.6) | 513(39.6)   | 2630(61.1) | 2792(38)   | 2427(36.3) | 1965(40)   | 1195(36.9) | 1120(19)   | 1028(20.3) | 991(40.4)  | 17617 (37.8) |
| Rich                            | 885(16.3)  | 216(16.6)   | 667(15.5)  | 2741(37.2) | 1056(15.7) | 736(15)    | 576(17.8)  | 2203(37.3) | 1629(32.1) | 349(14.2)  | 7840 (16.8)  |
| Household Decision making       |            |             |            |            |            |            |            |            |            |            |              |
| Involved                        | 2485(50.7) | 296(25.4)   | 2618(64.3) | 1048(35.9) | 1953(35.6) | 1517(36.8) | 1479(56.6) | 1563(31.8) | 1782(43.8) | 1280(61.2) | 16020 (44.1) |
| Not involved                    | 2415(49.3) | 870(74.6)   | 1452(35.7) | 1868(64.1) | 3528(64.4) | 2610(63.2) | 1133(43.4) | 3352(68.2) | 2290(56.2) | 810(38.8)  | 20328 (55.9) |
| Health facility distance        |            |             |            |            |            |            |            |            |            |            |              |
| Challenging                     | 1793(33.1) | 600(46.3)   | 2606(60.5) | 947(26.7)  | 3830(57.2) | 2905(59.1) | 745(23)    | 2407(40.8) | 2268(44.7) | 968(39.5)  | 19069 (44.5) |
| Not challenging                 | 3619(66.9) | 698(53.7)   | 1702(39.5) | 2595(73.3) | 2863(42.8) | 2008(40.9) | 2491(77)   | 3494(59.2) | 2807(55.3) | 1485(60.5) | 23761 (55.5) |
| Aware perinatal MTCT of HIV     |            |             |            |            |            |            |            |            |            |            |              |
| Aware MTCT during pregnancy     |            |             |            |            |            |            |            |            |            |            |              |
| No                              | 735(14)    | 484(38.8)   | 1216(31.2) | 3425(46.8) | 1278(19.5) | 969(20.1)  | 1014(31.4) | 1675(28.4) | 1838(36.4) | 198(8.2)   | 12831 (28.1) |
| Yes                             | 4517(86)   | 761(61.2)   | 2676(68.8) | 3901(53.2) | 5261(80.5) | 3834(79.9) | 2218(68.6) | 4214(71.6) | 3216(63.6) | 2229(91.8) | 32827 (71.9) |
| Aware MTCT during birth         |            |             |            |            |            |            |            |            |            |            |              |
| No                              | 281(5.4)   | 530(42.6)   | 1026(26.4) | 1621(22.1) | 1018(15.6) | 941(19.6)  | 105(3.3)   | 398(6.8)   | 559(11.1)  | 270(11.1)  | 6750 (14.8)  |
| Yes                             | 4971(94.6) | 715(57.4)   | 2866(73.6) | 5708(77.9) | 5520(84.4) | 3862(80.4) | 3129(96.7) | 5491(93.2) | 4494(88.9) | 2157(88.9) | 38914 (85.2) |
| Aware MTCT during breastfeeding |            |             |            |            |            |            |            |            |            |            |              |
| No                              | 484(9.2)   | 469(37.7)   | 887(22.8)  | 815(11.1)  | 608(9.3)   | 817(17)    | 166(5.1)   | 577(9.8)   | 413(8.2)   | 363(15)    | 5600 (12.3)  |
| Yes                             | 4768(90.8) | 776(62.3)   | 3005(77.2) | 6514(88.9) | 5930(90.7) | 3986(83)   | 3069(94.9) | 5312(90.2) | 4640(91.8) | 2064(85)   | 40064 (87.7) |
| <b>Need factors</b>             |            |             |            |            |            |            |            |            |            |            |              |
| A desire for the pregnancy      |            |             |            |            |            |            |            |            |            |            |              |
| Wanted pregnancy                | 4884(90.2) | 1176 (90.6) | 3943(91.5) | 3155(89.1) | 5933(88.7) | 4750(96.7) | 2800(86.6) | 5351(90.7) | 4751(93.7) | 2270(92.5) | 39012 (91.1) |
| Unwanted pregnancy              | 528(9.8)   | 122 (9.4)   | 365(8.5)   | 387(10.9)  | 760(11.3)  | 163(3.3)   | 433(13.4)  | 550(9.3)   | 320(6.3)   | 184 (7.5)  | 3812 (8.9)   |

n= weighted number of women who participated in the study in each and all East African countries
